# Supplementary material for: A retrospective study investigating the clinical significance of body mass index in acute pancreatitis
Source: PeerJ. 2024 Jan 29;12:e16854. doi: 10.7717/peerj.16854 (PMC10832621; doi:10.7717/peerj.16854)
Supplement: Supplemental Information 1 — The raw data shows high BMI is a risk factor for the occurrence and progression of AP and positively associated with recurrence, and underweight also exacerbates AP. The relationship between BMI and AP deserves continuous attention. [file peerj-12-16854-s001.xlsx]

## Sheet: AP
Serial number	Age	Sex	BMI	Hospital stay duration/day	Triggers	Hypertension	Diabetes mellitus	Steatohepatitis	Menopause	Smoking/year	Drinking/year	History of abdominal surgery	Incipience/Palindromia	Recurrences within 6 months post-discharge	Etiology	Classify	Severity
1	53	woman	25.56	8	improper diet	yes	deny	deny	yes	/	/	have	repeated	deny	Bile origin	edematous	mild case
2	29	woman	26.61	9	Unknown reason	deny	yes	deny	deny	/	/	have	repeated	deny	Hyperlipidaemia	edematous	In severe cases
3	64	man	21.26	3	drink	deny	deny	deny	/	10	a small amount	not have	repeated	deny	Bile origin	edematous	mild case
4	36	man	26.12	4	drink	deny	deny	yes	/	/	a small amount	have	repeated	deny	Hyperlipidaemia	Haemorrhagic necrosis	In severe cases
5	53	woman	26.04	7	tired	yes	deny	deny	yes	/	/	not have	At the beginning	deny	Bile origin	edematous	mild case
6	22	man	25.17	4	improper diet	deny	deny	yes	/	/	/	not have	At the beginning	deny	Hyperlipidaemia	edematous	mild case
7	76	man	24.8	5	improper diet	yes	deny	deny	/	/	/	have	repeated	yes	Bile origin	edematous	In severe cases
8	33	woman	21.05	8	iatrogenic	deny	deny	deny	deny	/	/	have	repeated	deny	Idiopathic	edematous	mild case
9	26	man	18.94	10	improper diet	deny	deny	deny	/	/	a small amount	not have	At the beginning	deny	Bile origin	edematous	mild case
10	68	man	22.76	6	improper diet	yes	deny	yes	/	/	/	not have	repeated	yes	Bile origin	edematous	mild case
11	31	woman	21.57	8	Poor control of diabetes mellitus	deny	yes	deny	deny	/	/	not have	repeated	yes	Hyperlipidaemia	edematous	mild case
12	31	man	28.41	7	drink	yes	deny	yes	/	have	have	not have	repeated	deny	Hyperlipidaemia	edematous	mild case
13	55	woman	29.41	6	Unknown reason	deny	yes	yes	yes	/	/	not have	At the beginning	deny	Bile origin	edematous	mild case
14	43	man	26.93	14	tired	deny	deny	yes	/	/	/	not have	At the beginning	deny	Idiopathic	Haemorrhagic necrosis	grave
15	60	woman	31.11	6	improper diet	deny	deny	deny	deny	/	/	have	At the beginning	deny	Idiopathic	edematous	mild case
16	57	woman	28.13	7	improper diet	yes	deny	deny	yes	15	20	have	At the beginning	deny	alcoholic	edematous	mild case
17	39	woman	24.34	6	catch cold	deny	deny	deny	deny	/	/	not have	At the beginning	deny	Bile origin	edematous	mild case
18	54	man	22.04	3	Unknown reason	deny	deny	deny	/	/	/	not have	At the beginning	deny	Bile origin	edematous	mild case
19	45	woman	25.39	9	improper diet	deny	deny	deny	yes	/	/	have	At the beginning	deny	Idiopathic	edematous	mild case
20	59	man	21.12	8	iatrogenic	deny	deny	deny	/	30	/	not have	At the beginning	deny	Idiopathic	edematous	mild case
21	55	man	25.18	7	Unknown reason	deny	deny	deny	/	/	/	not have	At the beginning	deny	Bile origin	edematous	mild case
22	23	man	23.81	3	improper diet	deny	deny	deny	/	/	/	not have	repeated	yes	Idiopathic	edematous	mild case
23	40	man	26.12	11	drink	deny	deny	deny	/	/	/	have	repeated	deny	alcoholic	edematous	In severe cases
24	68	man	31.23	7	Unknown reason	yes	yes	deny	/	/	/	have	At the beginning	deny	Idiopathic	edematous	In severe cases
25	41	man	23.94	5	improper diet	deny	deny	deny	/	/	/	not have	repeated	yes	Bile origin	edematous	mild case
26	62	woman	28.65	6	Poor control of diabetes mellitus	yes	yes	deny	yes	/	/	not have	repeated	deny	Bile origin	edematous	mild case
27	59	man	21.11	3	drink	deny	deny	deny	/	/	/	not have	At the beginning	deny	alcoholic	edematous	mild case
28	68	man	22.76	6	improper diet	yes	deny	deny	/	/	/	not have	At the beginning	yes	Bile origin	edematous	mild case
29	34	man	27.4	7	Unknown reason	deny	deny	deny	/	/	/	have	repeated	deny	Idiopathic	edematous	mild case
30	40	man	22.2	4	drink	deny	deny	yes	/	10	10	not have	At the beginning	deny	alcoholic	edematous	mild case
31	56	woman	23.23	4	catch cold	deny	deny	deny	/	/	/	not have	repeated	deny	Idiopathic	edematous	mild case
32	67	woman	44.85	10	Unknown reason	yes	deny	yes	/	/	/	have	repeated	deny	Bile origin	Haemorrhagic necrosis	grave
33	87	man	26.53	17	drink	yes	yes	deny	/	/	50	have	At the beginning	deny	Bile origin	Haemorrhagic necrosis	grave
34	45	man	20.9	6	drink	deny	deny	yes	/	20	20	not have	At the beginning	deny	alcoholic	edematous	mild case
35	47	man	27.76	6	Unknown reason	yes	yes	yes	/	/	/	not have	At the beginning	deny	Hyperlipidaemia	edematous	mild case
36	45	man	23.51	4	Poor control of diabetes mellitus	deny	yes	yes	/	/	/	not have	repeated	deny	Hyperlipidaemia	edematous	mild case
37	32	woman	18.82	4	improper diet	deny	deny	deny	deny	/	/	not have	At the beginning	deny	Bile origin	edematous	mild case
38	82	woman	25.71	5	tired	yes	yes	deny	yes	/	/	have	At the beginning	deny	Bile origin	edematous	mild case
39	59	woman	24.39	9	Unknown reason	deny	deny	deny	yes	/	/	not have	At the beginning	deny	Idiopathic	edematous	In severe cases
40	24	woman	24.09	5	improper diet	deny	deny	yes	deny	/	/	have	At the beginning	deny	Idiopathic	edematous	mild case
41	64	man	29.74	11	improper diet	deny	deny	deny	/	/	/	have	repeated	yes	Bile origin	edematous	In severe cases
42	50	man	17.01	6	improper diet	deny	deny	deny	/	20	20	not have	At the beginning	deny	Hyperlipidaemia	edematous	mild case
43	47	woman	29.07	3	improper diet	deny	deny	deny	yes	/	/	have	At the beginning	deny	Bile origin	edematous	mild case
44	55	man	25.39	8	improper diet	deny	deny	yes	yes	/	/	have	repeated	deny	Bile origin	edematous	mild case
45	80	man	25.35	7	Unknown reason	deny	deny	deny	/	/	/	have	repeated	yes	Bile origin	edematous	mild case
46	53	woman	16.41	7	Unknown reason	yes	yes	deny	yes	/	/	have	At the beginning	deny	Bile origin	edematous	mild case
47	41	woman	28.04	7	Unknown reason	deny	yes	deny	deny	/	/	have	At the beginning	deny	Hyperlipidaemia	Haemorrhagic necrosis	In severe cases
48	54	woman	34.9	10	catch cold	deny	deny	yes	yes	/	/	not have	At the beginning	deny	Bile origin	edematous	In severe cases
49	36	man	23.67	7	Poor control of diabetes mellitus	yes	deny	yes	/	/	/	not have	At the beginning	deny	Hyperlipidaemia	edematous	mild case
50	73	man	25.25	5	Unknown reason	deny	deny	yes	/	/	/	have	repeated	deny	Idiopathic	edematous	mild case
51	57	man	33.95	11	Unknown reason	yes	deny	deny	/	/	/	not have	At the beginning	deny	Bile origin	edematous	In severe cases
52	28	woman	24.46	12	Unknown reason	deny	deny	deny	deny	/	/	not have	At the beginning	deny	Bile origin	edematous	In severe cases
53	37	woman	28.37	15	improper diet	deny	yes	deny	deny	/	/	have	repeated	deny	Hyperlipidaemia	Haemorrhagic necrosis	grave
54	44	woman	26.45	8	Unknown reason	deny	deny	deny	deny	/	/	have	At the beginning	deny	Idiopathic	edematous	mild case
55	52	woman	33.79	10	improper diet	deny	deny	yes	yes	/	/	have	At the beginning	deny	Hyperlipidaemia	Haemorrhagic necrosis	In severe cases
56	56	man	27.25	6	drink	deny	deny	yes	/	/	have	have	repeated	deny	alcoholic	edematous	In severe cases
57	56	woman	26.9	6	improper diet	deny	deny	deny	yes	/	/	have	At the beginning	deny	Idiopathic	Haemorrhagic necrosis	In severe cases
58	61	man	25.47	7	Unknown reason	deny	deny	yes	/	/	/	not have	repeated	deny	Bile origin	edematous	mild case
59	37	man	26.57	6	improper diet	deny	deny	yes	/	/	/	not have	At the beginning	deny	Bile origin	edematous	mild case
60	42	man	31.44	14	drink	yes	deny	yes	/	10	20	not have	repeated	deny	alcoholic	Haemorrhagic necrosis	grave
61	58	man	29.34	40	iatrogenic	yes	yes	deny	/	/	/	have	At the beginning	deny	Bile origin	Haemorrhagic necrosis	grave
62	25	woman	22.19	3	drink	deny	deny	deny	deny	/	3	not have	At the beginning	deny	alcoholic	edematous	mild case
63	50	woman	25.12	18	Unknown reason	deny	deny	deny	yes	/	/	not have	repeated	deny	Bile origin	Haemorrhagic necrosis	In severe cases
64	42	man	32.27	7	improper diet	yes	yes	yes	/	/	/	not have	At the beginning	deny	Hyperlipidaemia	edematous	In severe cases
65	58	woman	27.19	10	Poor control of diabetes mellitus	yes	yes	yes	yes	/	/	not have	repeated	yes	Bile origin	Haemorrhagic necrosis	grave
66	58	woman	25.51	12	Unknown reason	yes	deny	deny	yes	/	/	have	At the beginning	deny	Bile origin	edematous	In severe cases
67	37	man	32.11	3	improper diet	yes	deny	yes	/	/	/	not have	At the beginning	deny	Hyperlipidaemia	edematous	mild case
68	33	man	25.35	10	improper diet	deny	deny	deny	/	/	/	not have	repeated	deny	Bile origin	edematous	In severe cases
69	70	woman	25.53	8	Unknown reason	yes	deny	deny	yes	/	/	not have	At the beginning	deny	Bile origin	edematous	mild case
70	31	man	31.74	15	improper diet	deny	yes	deny	/	/	/	not have	At the beginning	deny	Hyperlipidaemia	Haemorrhagic necrosis	grave
71	41	woman	27.01	13	improper diet	deny	deny	yes	deny	/	/	not have	At the beginning	deny	Bile origin	Haemorrhagic necrosis	In severe cases
72	52	woman	26.84	5	Unknown reason	deny	deny	deny	yes	/	/	have	repeated	deny	Bile origin	edematous	mild case
73	72	man	23.74	7	Unknown reason	deny	deny	deny	/	40	/	not have	At the beginning	deny	Bile origin	edematous	mild case
74	54	woman	24.97	9	improper diet	deny	deny	deny	yes	/	/	have	At the beginning	deny	Bile origin	edematous	mild case
75	57	woman	23.61	7	improper diet	yes	deny	deny	yes	/	/	not have	At the beginning	deny	Idiopathic	edematous	mild case
76	54	woman	22.03	14	improper diet	deny	deny	yes	yes	/	/	not have	At the beginning	deny	Hyperlipidaemia	edematous	mild case
77	26	man	27.68	12	Poor control of diabetes mellitus	deny	yes	deny	/	Occasionally have	Occasionally have	not have	At the beginning	yes	Hyperlipidaemia	Haemorrhagic necrosis	In severe cases
78	61	man	27.36	10	improper diet	deny	yes	deny	/	/	/	not have	At the beginning	deny	Bile origin	edematous	In severe cases
79	71	man	20.57	13	improper diet	deny	yes	deny	/	have	/	not have	At the beginning	deny	Idiopathic	edematous	mild case
80	73	woman	20.03	7	improper diet	deny	deny	deny	yes	/	/	not have	repeated	yes	Bile origin	edematous	mild case
81	59	man	28.41	8	drink	yes	yes	yes	/	20	20	not have	repeated	deny	Hyperlipidaemia	edematous	In severe cases
82	48	woman	22.51	7	tired	deny	deny	deny	yes	/	/	not have	repeated	deny	Bile origin	edematous	mild case
83	37	woman	28.72	10	Unknown reason	deny	deny	deny	deny	/	/	have	repeated	deny	Bile origin	edematous	In severe cases
84	68	man	18.78	10	Unknown reason	deny	deny	deny	/	/	/	not have	repeated	deny	Idiopathic	edematous	mild case
85	51	man	25.35	26	drink	deny	yes	deny	/	20	20	have	At the beginning	deny	Hyperlipidaemia	Haemorrhagic necrosis	grave
86	46	woman	22.77	8	improper diet	deny	deny	yes	deny	/	/	not have	At the beginning	deny	Idiopathic	edematous	mild case
87	67	woman	26.48	5	tired	deny	yes	deny	yes	/	/	have	repeated	deny	Bile origin	edematous	mild case
88	46	man	24.77	6	tired	deny	deny	deny	yes	/	/	not have	At the beginning	deny	Idiopathic	edematous	mild case
89	70	man	23.15	7	improper diet	yes	yes	deny	/	40	/	have	At the beginning	deny	Bile origin	edematous	mild case
90	42	man	25.14	6	Unknown reason	deny	deny	yes	/	10	/	not have	At the beginning	deny	Idiopathic	edematous	mild case
91	67	woman	23.73	9	improper diet	yes	deny	deny	yes	/	/	not have	At the beginning	deny	Bile origin	edematous	mild case
92	49	woman	27.06	8	Unknown reason	yes	yes	yes	deny	/	/	have	At the beginning	deny	Hyperlipidaemia	edematous	mild case
93	49	man	32.28	8	improper diet	deny	deny	yes	/	/	/	not have	At the beginning	deny	Bile origin	edematous	In severe cases
94	44	man	29.34	9	improper diet	yes	yes	yes	/	/	/	not have	At the beginning	deny	Hyperlipidaemia	edematous	mild case
95	43	man	27.77	5	Unknown reason	deny	deny	deny	/	/	/	not have	repeated	deny	Idiopathic	edematous	mild case
96	34	man	33.9	6	improper diet	yes	yes	yes	/	10	/	not have	repeated	deny	Hyperlipidaemia	edematous	In severe cases
97	70	woman	23.63	12	improper diet	yes	deny	yes	yes	/	/	have	At the beginning	deny	Bile origin	edematous	In severe cases
98	41	man	23.14	7	Unknown reason	deny	deny	yes	/	/	/	not have	At the beginning	deny	Hyperlipidaemia	edematous	mild case
99	39	man	25.35	10	improper diet	deny	deny	yes	/	20	6	not have	At the beginning	deny	Hyperlipidaemia	edematous	In severe cases
100	38	man	23.89	6	Unknown reason	deny	deny	yes	/	/	/	not have	At the beginning	deny	Hyperlipidaemia	edematous	mild case
101	61	man	21.31	8	Unknown reason	deny	deny	deny	/	20	/	not have	At the beginning	deny	Idiopathic	edematous	mild case
102	66	man	21.34	4	tired	deny	deny	deny	/	/	/	not have	At the beginning	deny	Bile origin	edematous	mild case
103	37	man	26.75	12	Unknown reason	yes	deny	yes	/	18	/	have	At the beginning	deny	Bile origin	edematous	mild case
104	69	man	22.04	11	improper diet	deny	deny	yes	/	40	/	have	repeated	deny	Bile origin	edematous	mild case
105	56	man	21.46	18	iatrogenic	deny	deny	deny	/	40	/	not have	At the beginning	deny	Idiopathic	edematous	mild case
106	57	man	33.95	11	Unknown reason	yes	deny	deny	/	/	/	not have	At the beginning	deny	Bile origin	edematous	In severe cases
107	58	woman	21.48	8	Unknown reason	yes	deny	yes	deny	/	/	not have	At the beginning	deny	Bile origin	edematous	mild case
108	43	man	26.35	5	Unknown reason	deny	deny	yes	/	/	/	not have	At the beginning	deny	Hyperlipidaemia	edematous	mild case
109	70	woman	18.36	4	improper diet	deny	yes	deny	yes	/	/	not have	At the beginning	deny	Idiopathic	edematous	mild case
110	42	man	25.71	8	improper diet	yes	deny	yes	/	/	/	not have	At the beginning	deny	Hyperlipidaemia	edematous	mild case
111	70	woman	27.29	8	tired	deny	deny	deny	yes	/	/	not have	At the beginning	deny	Bile origin	edematous	mild case
112	71	woman	16.87	5	catch cold	deny	deny	deny	yes	/	/	have	At the beginning	deny	Bile origin	edematous	mild case
113	37	woman	24.61	10	Poor control of diabetes mellitus	deny	deny	yes	deny	/	/	not have	At the beginning	deny	Hyperlipidaemia	edematous	mild case
114	88	woman	26.04	18	Unknown reason	yes	deny	deny	yes	/	/	not have	At the beginning	deny	Bile origin	Haemorrhagic necrosis	grave
115	55	woman	23.44	5	catch cold	deny	deny	deny	yes	/	/	have	At the beginning	deny	Bile origin	edematous	mild case
116	54	woman	24.22	5	improper diet	deny	deny	deny	yes	/	have	not have	At the beginning	deny	alcoholic	edematous	mild case
117	28	man	32.28	9	improper diet	deny	deny	yes	/	/	/	not have	At the beginning	deny	Hyperlipidaemia	Haemorrhagic necrosis	In severe cases

## Sheet: non-AP
Serial number	Age	Sex	BMI	Smoking/year	Drinking/year
1	30	man	25.35	/	/
2	42	man	17.96	/	have
3	54	woman	22.04	/	/
4	33	man	23.14	/	/
5	56	man	26.42	15	/
6	71	woman	16.65	/	/
7	60	woman	27.56	/	/
8	38	man	25.69	/	/
9	40	woman	24.33	/	/
10	57	woman	20.54	/	/
11	37	man	24.49	/	7
12	36	man	26.83	/	/
13	31	woman	27.34	/	/
14	46	woman	22.15	/	/
15	59	man	28.36	/	/
16	62	man	27.01	/	/
17	30	man	30.86	/	/
18	27	man	21.47	12	/
19	52	woman	25.53	/	/
20	54	man	23.51	/	/
21	31	man	22.59	/	/
22	30	man	26.3	1	5
23	32	man	24.51	/	/
24	28	woman	17.3	/	/
25	20	woman	24.03	/	/
26	53	man	27.1	/	/
27	34	man	21.63	/	/
28	57	man	22.04	3	/
29	32	man	25.06	10	/
30	48	woman	20.2	/	/
31	34	man	29.39	/	/
32	39	woman	22.27	/	/
33	61	man	19.37	/	10
34	34	man	25.31	/	/
35	35	man	17.96	/	/
36	36	woman	19.2	/	/
37	33	man	23.39	/	/
38	62	woman	16.61	/	/
39	52	woman	29.3	/	/
40	42	man	25.99	7	/
41	26	man	31.8	/	/
42	26	woman	17.72	/	/
43	66	woman	25.39	/	20
44	35	man	30.22	/	/
45	62	woman	20.81	/	/
46	25	woman	20.83	/	/
47	40	woman	25.39	/	/
48	12	woman	16.01	/	/
49	57	man	21.3	30	/
50	60	woman	25.82	/	/
51	62	man	22.49	/	10
52	28	man	29.76	/	/
53	32	man	25.25	/	/
54	38	woman	22.86	/	/
55	39	man	26.23	/	/
56	28	woman	20.08	/	/
57	62	man	25.26	/	/
58	35	man	20.16	/	/
59	71	man	21.77	/	/
60	23	man	21.26	/	/
61	60	man	35.55	/	/
62	41	woman	23.44	/	/
63	57	man	38.22	20	/
64	23	man	23.7	/	/
65	25	woman	33.8	/	/
66	59	woman	24.41	/	/
67	54	man	29.39	/	20
68	33	man	24.76	/	/
69	35	man	24.68	/	/
70	33	woman	23.44	/	/
71	39	woman	22.99	/	/
72	46	man	24.97	20	/
73	76	woman	26.67	/	/
74	46	man	32.28	/	/
75	30	man	20.05	/	/
76	74	woman	22.06	/	/
77	38	woman	24.09	/	/
78	12	man	17.85	/	/
79	34	man	20.76	/	/
80	37	woman	25.95	/	/
81	61	woman	17.85	/	5
82	66	woman	22.22	/	/
83	41	man	26.78	/	/
84	65	man	26.17	/	/
85	41	woman	23.44	/	/
